# Supplementary material
Source: publisher figshare collection journal article supplement (https://sage.figshare.com/ndownloader/files/16188233)
Supplement: Supplementary file 1 [file 16188233]

## Sheet: Expertise (2)
Appendix B: Full list of reported expertise
What is your area of expertise?
Acute care in a teaching trust.
Adult critical care nursing
An expert in nothing, experience of something, thought about everything.
Anaesthesia/ICU
Anaesthesia/ICU
Anaesthetics and Critical Care
Anaesthetics and Intensive Care Medicine
Anti-infective pharmacology; critical care trials
Cardiac ICU
Cardiothoracic Intensive Care
CCU Research
Clinical Pharmacy
Clinical Trials
Consultant intensivist
Critical Care
Critical Care
Critical Care
Critical Care
Critical care
critical care
Critical Care
Critical care
Critical Care
Critical care
Critical Care
Critical care
Critical care
Critical Care / Anaesthesia
Critical Care & research
Critical Care Muscle physiology, rehabilitation, chronic critical illness
Critical Care Nursing
Critical care of patients with liver disease and liver transplantation, extracoporeal therapies in ICU, infectious diseases and sepsis
Critical care outreach
Critical Care Pharmacy
Critical Care Rehabilitation and Follow Up and Standardised Major Elective Surgery Post-Operative Pathways
Critical care research
Critical Care, Physiotherapy, Rehabilitation
Critical care/ Anaesthetic Consultant
End of life care in ITU, esp terminal discharge, delirium, ethics and law
Ex ICU Sister recently joined Research Dept
Fluid management in critical illness
Haematology
ICM
ICM, general and acute medicine.
ICU
ICU
ICU
ICU (general)
ICU and Anaesthesia
ICU consultant, research
ICU delirium
ICU doctor
Icu registrar
ICU
Icu, Patient Safety. “VAP”
ICU, physiology, altitude, exercise, oxygen
Intensive care medicine
Intensive Care Medicine & Respiratory Medicine (specialist interred in long term ventilation and weaning)
Intensive Care Medicine; cardiology. Muscle function. Big data. Nutrition.
Intensive Care, immunology/neutrophil biology, nosocomial infection
Intensive care/anaesthesia
Interests in Critical Care (healthcare-associated infection; epidemiology; human factors)
Nephrology and Intensive Care Medicine
Neuro critical care
Neuro, Trauma, Delirium.
Paediatric Critical Care
Paediatric Intensive Care
Paediatric Intensive Care
Paediatric Intensive Care
Paediatric Intensive Care Medicine
Paediatric Intensive Care, Paediatric Infectious Disease, Paediatric Research
Perioperative medicine, shared decion making, HDU care
Perioperative medicine/ pain management
PICU and health services research
PICU, Early Warning
POCUS
Professor of Respiratory and Critical Care Medicine
Resp support / trauma and burns / neuro
Respiratory failure
Respiratory medicine
Sepsis
Sepsis / Infection
Weaning, swallowing problems, communication in critical care patients, specifically spinal cord injury
